# Supplementary material for: Vitamin D3attenuates cisplatin-induced intestinal injury by inhibiting ferroptosis, oxidative stress, and ROS-mediated excessive mitochondrial fission
Source: Royal Society of Chemistry journal article supplement (doi:10.1039/d2fo01028c), 2022-01-01
Supplement: d2fo01028c1.pdf [file d2fo01028c1.pdf]

**Figure S1 Effects of vitamin D pretreatment on cisplatin-induced weight changes in mice.**

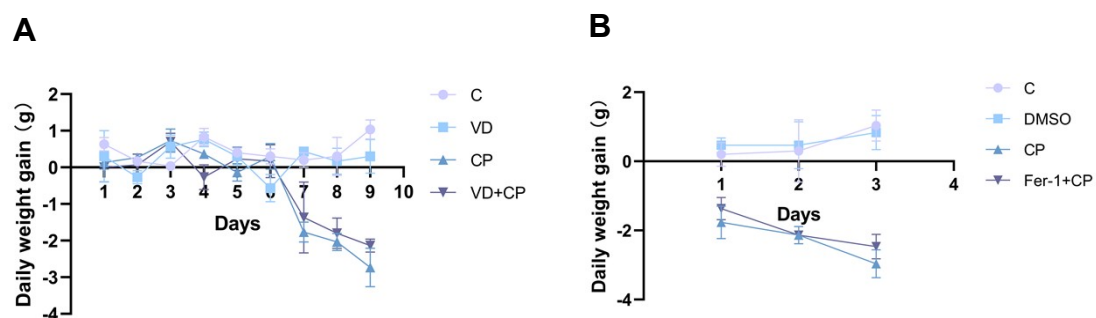

**Fig. S1** Effects of vitamin D pretreatment on cisplatin-induced weight changes in mice. (A) Daily changes of body weight in mice (n=12). (B) Daily changes of body weight in mice (n=9). Abbreviations: C, control group; VD, vitamin D<sub>3</sub> group; CP, CP group; VD + CP, vitamin D<sub>3</sub> + CP, DMSO, DMSO group; CP, CP group; Fer-1 + CP, Fer-1 + CP group.

**Figure S2 Dosage determination of vitamin D<sub>3</sub>.**

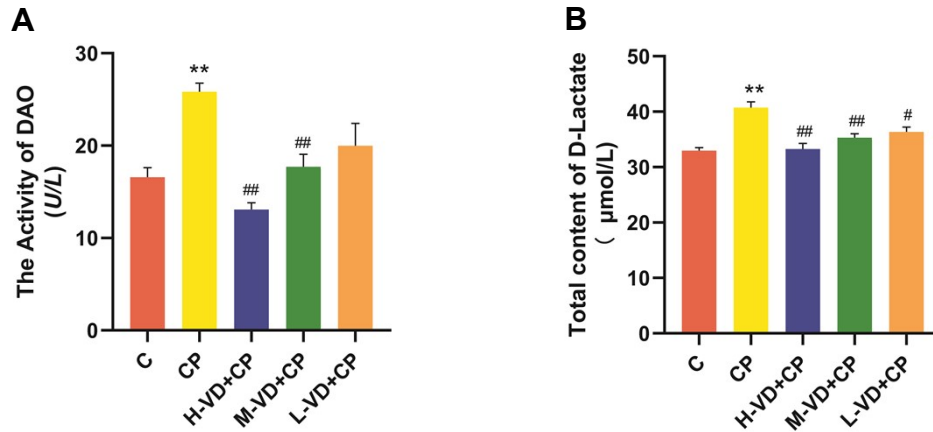

**Fig. S2 Dosage determination of vitamin D<sub>3</sub>.** (A) DAO levels in mouse serum (n = 6); (B) D-Lactate levels in mouse serum were measured by ELISA (n = 6). Data are presented as the mean ± SEM. \*\**P* < 0.01 compared to the C group, #*P* < 0.05, ##*P* < 0.01 compared to the CP group. A value of *P* less than 0.05 was regarded as statistically significant. Abbreviations: C, control group; CP, CP group; H-VD + CP, 2800 IU/kg/Day vitamin D<sub>3</sub> + CP; M-VD + CP, 1400 IU/kg/day vitamin D<sub>3</sub> + CP group; L-VD + CP, 700 IU/kg/day vitamin D<sub>3</sub> + CP group.

**Figure S3 Vitamin D levels in mouse serum.**

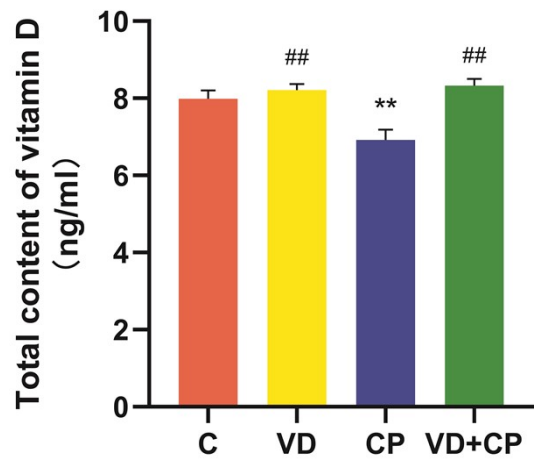

**Fig. S2 Vitamin D levels in mouse serum.** Data are presented as the mean  $\pm$  SEM ( $n = 6$ ). \*\* $P < 0.01$  compared to the C group, ## $P < 0.01$  compared to the CP group. A value of  $P$  less than 0.05 was regarded as statistically significant. Abbreviations: C, control group; VD, vitamin D<sub>3</sub> group; CP, CP group; VD + CP, vitamin D<sub>3</sub> + CP group.
